# Supplementary material for: Persistent pulmonary pathology after COVID-19 is associated with high viral load, weak antibody response, and high levels of matrix metalloproteinase-9
Source: PubMed Central journal article supplement (PMC8636497; doi:10.1038/s41598-021-02547-x), 2021-12-01
Supplement: 41598_2021_2547_MOESM1_ESM.pdf [file 41598_2021_2547_MOESM1_ESM.pdf]

**Supplementary table 1.** Overview of missing values, n (%).

|                                                  | <b>Overall, n =<br/>108</b> | <b>Remdesivir +<br/>SoC, n= 16</b> | <b>SoC, n=27</b> | <b>HCQ + SoC, n = 40</b> | <b>SoC, n = 47</b> |
|--------------------------------------------------|-----------------------------|------------------------------------|------------------|--------------------------|--------------------|
| <b>Demographics</b>                              |                             |                                    |                  |                          |                    |
| Age, years                                       | 0                           | 0                                  | 0                | 0                        | 0                  |
| Female, n (%)                                    | 0                           | 0                                  | 0                | 0                        | 0                  |
| Body Mass Index (kg/m <sup>2</sup> )             | 6 (5.6)                     | 0                                  | 2 (7.4)          | 2 (5.0)                  | 4 (8.5)            |
| Smoking history                                  | 4 (3.7)                     | 2 (12.5)                           | 1 (3.7)          | 0 (0)                    | 2 (4.3)            |
| <b>Comorbidities</b>                             |                             |                                    |                  |                          |                    |
| Chronic pulmonary disease                        | 0                           | 0                                  | 0                | 0                        | 0                  |
| Hypertension                                     | 0                           | 0                                  | 0                | 0                        | 0                  |
| Diabetes mellitus                                | 0                           | 0                                  | 0                | 0                        | 0                  |
| Obesity (BMI > 30 kg/m <sup>2</sup> ), n (%)     | 6 (5.6)                     | 0                                  | 2 (7.4)          | 4 (8.5)                  | 2 (5.0)            |
| <b>Baseline characteristics</b>                  |                             |                                    |                  |                          |                    |
| Duration of symptoms prior to baseline (days)    | 0                           | 0                                  | 0                | 0                        | 0                  |
| P/F-ratio (kPa)                                  | 1 (0.9)                     | 0                                  | 0                | 1 (2.5)                  | 0                  |
| Respiration rate per minute                      | 0                           | 0                                  | 0                | 0                        | 0                  |
| Temperature (°C)                                 | 0                           | 0                                  | 0                | 0                        | 0                  |
| Admission to ward, n (%)                         | 0                           | 0                                  | 0                | 0                        | 0                  |
| Admission to ICU, n (%)                          | 0                           | 0                                  | 0                | 0                        | 0                  |
| <b>Biochemical presentation</b>                  |                             |                                    |                  |                          |                    |
| Haemoglobin (g/dL)                               | 0                           | 0                                  | 0                | 0                        | 0                  |
| White blood cell count (x 10 <sup>9</sup> per L) | 0                           | 0                                  | 0                | 0                        | 0                  |
| Lymphocytes (x 10 <sup>9</sup> per L)            | 5 (4.6)                     | 0                                  | 2 (7.4)          | 2 (5.0)                  | 2 (4.3)            |
| Platelet count (x 10 <sup>9</sup> per L)         | 0                           | 0                                  | 0                | 0                        | 0                  |
| Creatinine (µmol/L)                              | 1 (0.9)                     | 0                                  | 0                | 1 (2.5)                  | 0                  |
| Ferritin (µg/L)                                  | 4 (3.7)                     | 0                                  | 0                | 1 (2.5)                  | 3 (6.4)            |
| CRP                                              | 0                           | 0                                  | 0                | 0                        | 0                  |

|                                               |           |          |          |           |           |
|-----------------------------------------------|-----------|----------|----------|-----------|-----------|
| LDH (U/L)                                     | 3 (2.8)   | 0        | 2 (7.4)  | 0         | 3 (6.4)   |
| <b>Viral load (oropharynx) at baseline</b>    | 25 (23.1) | 3 (18.8) | 2 (7.4)  | 13 (32.5) | 9 (19.1)  |
| <b>Anti-SARS-CoV-2 antibodies at baseline</b> | 26 (24.1) | 2 (12.5) | 7 (25.9) | 11 (27.5) | 12 (25.5) |
| <b>Spirometry at three months</b>             | 7 (6.5)   | 1 (6.2)  | 0        | 2 (5.0)   | 4 (8.5)   |
| <b>Diffusion capacity at three months</b>     | 8 (7.4)   | 1 (6.2)  | 0        | 3 (7.5)   | 4 (8.5)   |
| <b>CAT-score at three months</b>              | 4 (3.7)   | 1 (6.2)  | 0        | 2 (5.9)   | 1 (2.1)   |
| <b>Chest CT at three months</b>               | 6 (5.6)   | 0        | 1 (3.7)  | 3 (7.5)   | 2 (4.3)   |
| <b>Biobanking during hospital admission</b>   | 17 (15.7) | 6 (23.0) |          | 4 (12.5)  |           |
| <b>Biobanking at three months</b>             | 10 (9.3)  | 3 (11.5) |          | 3 (9.4)   |           |

---

SoC, standard of care. HCQ, hydroxychloroquine. BMI, body mass index. P/F ratio, arterial oxygen pressure (pO<sub>2</sub>) divided by fraction of inspired oxygen (f<sub>i</sub>O<sub>2</sub>). ICU, intensive care unit. CRP, C-reactive protein. LDH, lactate dehydrogenase. CAT-score, COPD assessment test score. CT, computed tomography.

**Supplementary Table 2.** Association between symptoms assessed by CAT-score, DL<sub>CO</sub>%, and chest CT findings compared with normal chest CT at three months after hospital admission for COVID-19.

| <b>Respiratory symptoms (CAT score &gt; 10)</b> | <b>Coefficient estimate</b> | <b>95 % confidence interval</b> |
|-------------------------------------------------|-----------------------------|---------------------------------|
| DL <sub>CO</sub> %                              | < -0.01                     | (-0.03, 0.02)                   |
| Reversible CT changes (any)                     | -0.58                       | (-2.02, 0.71)                   |
| Irreversible CT findings (any)                  | 0.43                        | (-0.41, 1.30)                   |

CAT-score, the COPD assessment test score. DL<sub>CO</sub>, diffusion capacity of the lung for carbon monoxide, in percent of predicted. CT, computed tomography. Reversible CT findings defined as any occurrence of ground-glass opacities or mosaic pattern on chest CT. Irreversible CT findings defined as any occurrence of parenchymal bands, reticular pattern, interlobular septal thickening, consolidations or bronchiectasis.
